# Supplementary material
Source: Springer Nature journal article supplement (https://www.springermedizin.de/resource/supplementary/12913_2014_3390_MOESM7_ESM.pdf/9532652)
Supplement: MOESM7 [file 9532652]

# Repair of Fractured Neck of Femur

( $p < 0.001$ )\*

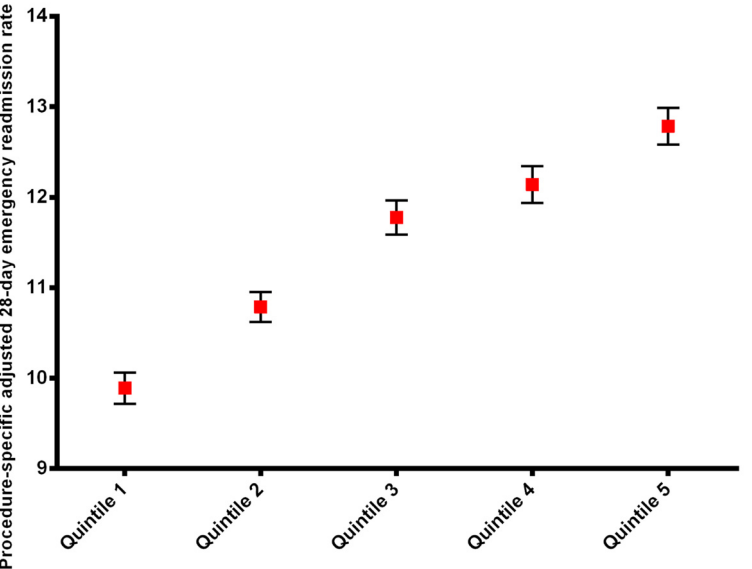

Quintile of "aggregate" 28-day risk-adjusted emergency readmission (1 = lowest, 5 = highest)
